# Supplementary material for: Unraveling the link between neuropathy target esterase NTE/SWS, lysosomal storage diseases, inflammation, abnormal fatty acid metabolism, and leaky brain barrier
Source: eLife. 2024 Apr 25;13:e98020. doi: 10.7554/eLife.98020 (PMC11090517; doi:10.7554/eLife.98020)
Supplement: Figure 5—source data 1. [file elife-98020-fig5-data1.xls]

## Sheet: Legend
Sample Number F	Genotype	Fly	Weight (g)			Formula	PAR/weight				C14:1 - 9-cis-Tetradecenoic acid
13	Oregon R	Flies heads	0.008								C16:0 - Palmitic acid
14	Oregon R		0.011								C16:1 - Palmitoleic acid
15	Oregon R		0.008								C18:0 - Stearic acid
16	sws1		0.002								C18:1 - Oleic acid
17	sws1		0.008								C18:2 - Linoleic acid
18	sws1		0.014								C18:3 - α- and γ-Linolenic acid
19	white1118		0.005								C20:0 - Eicosanoic acid
20	white1118		0.008								C20:4 - Arachidonic acid
21	white1118		0.006								C20:5 - Eicosapentaenoic acid
22	moodyC17		0.004
23	moodyC17		0.002
24	moodyC17		0.005

## Sheet: 5Z-Dodecenoic_acid
Component Name		Curve Index	Weighting Index	Origin Index	Equation
5Z-Dodecenoic acid, C12:1, m/z 197					N/A
					2_Nonadecenoic_acid, C19:1, 295		Specified	Calculated
Filename	Sample Type	Sample Name	Integ. Type	Area	ISTD Area	PAR	Amount	Amount	%Diff	%RSD-AMT	Peak Status	Level	Units	RT	Sample ID
01	Unknown Sample	Toluol 1	Method Settings	NF	313.709	#VALUE!	NA	NF	NF	NF	Not Found	NA	uM	NF	1
02	Unknown Sample	Toluol 2	Method Settings	NF	NF	#VALUE!	NA	NF	NF	NF	Not Found	NA	uM	NF	2
03	Unknown Sample	Toluol 3	Method Settings	NF	114.119	#VALUE!	NA	NF	NF	NF	Not Found	NA	uM	NF	3
04	Unknown Sample	Control-Std. a	Manual Integration	1339.32	2.01502e+06	0.00066467	NA	NA	NA	NA	Response Low	NA	uM	12.6205	4
05	Unknown Sample	Control-Std. b	Manual Integration	1423.2	2.6521e+06	0.000536631	NA	NA	NA	NA	Response Low	NA	uM	12.6064	5
06	Unknown Sample	Toluol 4	Method Settings	NF	582.298	#VALUE!	NA	NF	NF	NF	Not Found	NA	uM	NF	6
07	Unknown Sample	Toluol 5	Method Settings	NF	256.578	#VALUE!	NA	NF	NF	NF	Not Found	NA	uM	NF	7
08	Unknown Sample	Toluol 6	Method Settings	NF	39.0815	#VALUE!	NA	NF	NF	NF	Not Found	NA	uM	NF	8
09	Unknown Sample	F 13.a	Method Settings	NF	7.6654e+06	#VALUE!	NA	NF	NF	NF	Not Found	NA	uM	NF	9
10	Unknown Sample	F 13.b	Method Settings	NF	9.05293e+06	#VALUE!	NA	NF	NF	NF	Not Found	NA	uM	NF	10
11	Unknown Sample	F 14	Method Settings	1.47189e+06	1.12458e+07	0.130883	NA	NA	NA	NA	Response Low	NA	uM	12.6136	11
12	Unknown Sample	F 15	Method Settings	1.37798e+06	9.66642e+06	0.142553	NA	NA	NA	NA	Response Low	NA	uM	12.6134	12
13	Unknown Sample	F 16	Method Settings	1.11518e+06	1.03558e+07	0.107687	NA	NA	NA	NA	Response Low	NA	uM	12.6136	13
14	Unknown Sample	F 17	Method Settings	1.05038e+06	1.0482e+07	0.100208	NA	NA	NA	NA	Response Low	NA	uM	12.6134	14
15	Unknown Sample	F 18	Method Settings	1.06744e+06	1.13185e+07	0.0943085	NA	NA	NA	NA	Response Low	NA	uM	12.6132	15
16	Unknown Sample	F 19	Method Settings	1.1305e+06	1.02837e+07	0.109931	NA	NA	NA	NA	Response Low	NA	uM	12.6132	16
17	Unknown Sample	F 20	Method Settings	988328	1.00643e+07	0.0982014	NA	NA	NA	NA	Response Low	NA	uM	12.6133	17
18	Unknown Sample	F 21	Method Settings	1.2469e+06	9.85088e+06	0.126578	NA	NA	NA	NA	Response Low	NA	uM	12.6134	18
19	Unknown Sample	F 22	Method Settings	381454	8.70587e+06	0.0438158	NA	NA	NA	NA	Response Low	NA	uM	12.6134	19
20	Unknown Sample	F 23	Method Settings	582928	9.63896e+06	0.0604763	NA	NA	NA	NA	Response Low	NA	uM	12.6135	20
21	Unknown Sample	F 24	Method Settings	492547	9.91316e+06	0.0496862	NA	NA	NA	NA	Response Low	NA	uM	12.6135	21
22	Unknown Sample	F 1	Method Settings	1.67509e+06	1.42152e+07	0.117838	NA	NA	NA	NA	Response Low	NA	uM	12.6135	22
23	Unknown Sample	F 2	Method Settings	2.15687e+06	1.45011e+07	0.148739	NA	NA	NA	NA	Response Low	NA	uM	12.6135	23
24	Unknown Sample	F 3	Method Settings	1.95343e+06	1.46938e+07	0.132942	NA	NA	NA	NA	Response Low	NA	uM	12.6136	24
25	Unknown Sample	F 4	Method Settings	1.64095e+06	1.65408e+07	0.0992062	NA	NA	NA	NA	Response Low	NA	uM	12.6135	25
26	Unknown Sample	F 5	Method Settings	2.09109e+06	1.80101e+07	0.116106	NA	NA	NA	NA	Response Low	NA	uM	12.6134	26
27	Unknown Sample	F 6	Method Settings	1.31757e+06	1.44606e+07	0.0911143	NA	NA	NA	NA	Response Low	NA	uM	12.6134	27
28	Unknown Sample	F 7	Method Settings	1.95692e+06	1.64098e+07	0.119253	NA	NA	NA	NA	Response Low	NA	uM	12.6135	28
29	Unknown Sample	F 8	Method Settings	1.59171e+06	1.52802e+07	0.104168	NA	NA	NA	NA	Response Low	NA	uM	12.6136	29
30	Unknown Sample	F 9	Method Settings	1.73863e+06	1.4624e+07	0.118888	NA	NA	NA	NA	Response Low	NA	uM	12.6133	30
31	Unknown Sample	F 10	Method Settings	1.30462e+06	1.3123e+07	0.0994145	NA	NA	NA	NA	Response Low	NA	uM	12.6134	31
32	Unknown Sample	F 11	Method Settings	1.21123e+06	1.30574e+07	0.0927622	NA	NA	NA	NA	Response Low	NA	uM	12.6135	32
33	Unknown Sample	F 12	Method Settings	948422	1.16575e+07	0.081357	NA	NA	NA	NA	Response Low	NA	uM	12.6134	37
Control-Std: 1 mL MeCN + 10 µL 1 mM C19:1 (IS) + 1 µL 10 mM C20:4
Created By:
User Name		Full Name		Date
Beckmabi		Beckmann, Bibiana		4/29/2022 10:02:38 AM

## Sheet: Dodecanoic_acid
Component Name		Curve Index	Weighting Index	Origin Index	Equation
Dodecanoic acid, C12:0, 199, LAURIC ACID					N/A
					2_Nonadecenoic_acid		Specified	Calculated
Filename	Sample Type	Sample Name	Integ. Type	Area	ISTD Area	PAR	Amount	Amount	%Diff	%RSD-AMT	Peak Status	Level	Units	RT	Sample ID
01	Unknown Sample	Toluol 1	Method Settings	NF	313.709	#VALUE!	NA	NF	NF	NF	Not Found	NA	uM	NF	1
02	Unknown Sample	Toluol 2	Method Settings	NF	NF	#VALUE!	NA	NF	NF	NF	Not Found	NA	uM	NF	2
03	Unknown Sample	Toluol 3	Method Settings	NF	114.119	#VALUE!	NA	NF	NF	NF	Not Found	NA	uM	NF	3
04	Unknown Sample	Control-Std. a	Method Settings	9440.6	2.01502e+06	0.00468511	NA	NA	NA	NA	Response Low	NA	uM	12.6205	4
05	Unknown Sample	Control-Std. b	Method Settings	10209.1	2.6521e+06	0.00384944	NA	NA	NA	NA	Response Low	NA	uM	12.6136	5
06	Unknown Sample	Toluol 4	Method Settings	NF	582.298	#VALUE!	NA	NF	NF	NF	Not Found	NA	uM	NF	6
07	Unknown Sample	Toluol 5	Method Settings	NF	256.578	#VALUE!	NA	NF	NF	NF	Not Found	NA	uM	NF	7
08	Unknown Sample	Toluol 6	Method Settings	102.473	39.0815	2.62203	NA	NA	NA	NA		NA	uM	12.8801	8
09	Unknown Sample	F 13.a	Method Settings	NF	7.6654e+06	#VALUE!	NA	NF	NF	NF	Not Found	NA	uM	NF	9
10	Unknown Sample	F 13.b	Method Settings	NF	9.05293e+06	#VALUE!	NA	NF	NF	NF	Not Found	NA	uM	NF	10
11	Unknown Sample	F 14	Method Settings	5.081e+07	1.12458e+07	4.51813	NA	NA	NA	NA	Response Low	NA	uM	12.6208	11
12	Unknown Sample	F 15	Method Settings	4.64627e+07	9.66642e+06	4.80661	NA	NA	NA	NA	Response Low	NA	uM	12.6206	12
13	Unknown Sample	F 16	Method Settings	4.17826e+07	1.03558e+07	4.03472	NA	NA	NA	NA	Response Low	NA	uM	12.6209	13
14	Unknown Sample	F 17	Method Settings	3.74535e+07	1.0482e+07	3.57313	NA	NA	NA	NA	Response Low	NA	uM	12.6206	14
15	Unknown Sample	F 18	Method Settings	4.07769e+07	1.13185e+07	3.60266	NA	NA	NA	NA	Response Low	NA	uM	12.6204	15
16	Unknown Sample	F 19	Method Settings	5.26199e+07	1.02837e+07	5.11681	NA	NA	NA	NA	Response Low	NA	uM	12.6204	16
17	Unknown Sample	F 20	Method Settings	5.08893e+07	1.00643e+07	5.05642	NA	NA	NA	NA	Response Low	NA	uM	12.6206	17
18	Unknown Sample	F 21	Method Settings	5.2445e+07	9.85088e+06	5.32389	NA	NA	NA	NA	Response Low	NA	uM	12.6206	18
19	Unknown Sample	F 22	Method Settings	2.0311e+07	8.70587e+06	2.33302	NA	NA	NA	NA	Response Low	NA	uM	12.6206	19
20	Unknown Sample	F 23	Method Settings	2.57708e+07	9.63896e+06	2.67361	NA	NA	NA	NA	Response Low	NA	uM	12.6207	20
21	Unknown Sample	F 24	Method Settings	2.28629e+07	9.91316e+06	2.30632	NA	NA	NA	NA	Response Low	NA	uM	12.6207	21
22	Unknown Sample	F 1	Method Settings	8.84291e+07	1.42152e+07	6.22073	NA	NA	NA	NA	Response Low	NA	uM	12.6207	22
23	Unknown Sample	F 2	Method Settings	1.01017e+08	1.45011e+07	6.96616	NA	NA	NA	NA	Response Low	NA	uM	12.6207	23
24	Unknown Sample	F 3	Method Settings	1.01421e+08	1.46938e+07	6.90229	NA	NA	NA	NA	Response Low	NA	uM	12.6208	24
25	Unknown Sample	F 4	Method Settings	8.94074e+07	1.65408e+07	5.40526	NA	NA	NA	NA	Response Low	NA	uM	12.6207	25
26	Unknown Sample	F 5	Method Settings	1.09372e+08	1.80101e+07	6.07283	NA	NA	NA	NA	Response Low	NA	uM	12.6206	26
27	Unknown Sample	F 6	Method Settings	8.20511e+07	1.44606e+07	5.67412	NA	NA	NA	NA	Response Low	NA	uM	12.6206	27
28	Unknown Sample	F 7	Method Settings	1.03604e+08	1.64098e+07	6.31353	NA	NA	NA	NA	Response Low	NA	uM	12.6207	28
29	Unknown Sample	F 8	Method Settings	8.73711e+07	1.52802e+07	5.71793	NA	NA	NA	NA	Response Low	NA	uM	12.6208	29
30	Unknown Sample	F 9	Method Settings	1.00262e+08	1.4624e+07	6.85597	NA	NA	NA	NA	Response Low	NA	uM	12.6205	30
31	Unknown Sample	F 10	Method Settings	7.10577e+07	1.3123e+07	5.41473	NA	NA	NA	NA	Response Low	NA	uM	12.6206	31
32	Unknown Sample	F 11	Method Settings	7.50922e+07	1.30574e+07	5.75093	NA	NA	NA	NA	Response Low	NA	uM	12.6207	32
33	Unknown Sample	F 12	Method Settings	4.95419e+07	1.16575e+07	4.24978	NA	NA	NA	NA	Response Low	NA	uM	12.6206	37
Control-Std: 1 mL MeCN + 10 µL 1 mM C19:1 (IS) + 1 µL 10 mM C20:4
Created By:
User Name		Full Name		Date
Beckmabi		Beckmann, Bibiana		4/29/2022 10:02:38 AM

## Sheet: Tetradecanoic_acid
Component Name		Curve Index	Weighting Index	Origin Index	Equation
Tetradecanoic acid, C14:0, 227, Myristic acid					N/A
					2_Nonadecenoic_acid		Specified	Calculated
Filename	Sample Type	Sample Name	Integ. Type	Area	ISTD Area	PAR	Amount	Amount	%Diff	%RSD-AMT	Peak Status	Level	Units	RT	Sample ID
01	Unknown Sample	Toluol 1	Method Settings	78.9984	313.709	0.251821	NA	NA	NA	NA		NA	uM	13.4637	1
02	Unknown Sample	Toluol 2	Method Settings	89.1214	NF	#VALUE!	NA	NA	NA	NA		NA	uM	13.6588	2
03	Unknown Sample	Toluol 3	Method Settings	NF	114.119	#VALUE!	NA	NF	NF	NF	Not Found	NA	uM	NF	3
04	Unknown Sample	Control-Std. a	Method Settings	11444.8	2.01502e+06	0.00567972	NA	NA	NA	NA	Response Low	NA	uM	13.4277	4
05	Unknown Sample	Control-Std. b	Method Settings	12936.6	2.6521e+06	0.00487787	NA	NA	NA	NA	Response Low	NA	uM	13.4208	5
06	Unknown Sample	Toluol 4	Method Settings	NF	582.298	#VALUE!	NA	NF	NF	NF	Not Found	NA	uM	NF	6
07	Unknown Sample	Toluol 5	Method Settings	NF	256.578	#VALUE!	NA	NF	NF	NF	Not Found	NA	uM	NF	7
08	Unknown Sample	Toluol 6	Method Settings	93.1023	39.0815	2.38226	NA	NA	NA	NA		NA	uM	13.3342	8
09	Unknown Sample	F 13.a	Method Settings	NF	7.6654e+06	#VALUE!	NA	NF	NF	NF	Not Found	NA	uM	NF	9
10	Unknown Sample	F 13.b	Method Settings	NF	9.05293e+06	#VALUE!	NA	NF	NF	NF	Not Found	NA	uM	NF	10
11	Unknown Sample	F 14	Method Settings	8.93409e+07	1.12458e+07	7.94438	NA	NA	NA	NA	Response Low	NA	uM	13.428	11
12	Unknown Sample	F 15	Method Settings	8.6415e+07	9.66642e+06	8.93971	NA	NA	NA	NA	Response Low	NA	uM	13.4278	12
13	Unknown Sample	F 16	Method Settings	9.4083e+07	1.03558e+07	9.08509	NA	NA	NA	NA	Response Low	NA	uM	13.428	13
14	Unknown Sample	F 17	Method Settings	8.85958e+07	1.0482e+07	8.45219	NA	NA	NA	NA	Response Low	NA	uM	13.4278	14
15	Unknown Sample	F 18	Method Settings	8.93059e+07	1.13185e+07	7.89023	NA	NA	NA	NA	Response Low	NA	uM	13.4276	15
16	Unknown Sample	F 19	Method Settings	8.73307e+07	1.02837e+07	8.49212	NA	NA	NA	NA	Response Low	NA	uM	13.4276	16
17	Unknown Sample	F 20	Method Settings	7.70031e+07	1.00643e+07	7.65111	NA	NA	NA	NA	Response Low	NA	uM	13.4277	17
18	Unknown Sample	F 21	Method Settings	7.89598e+07	9.85088e+06	8.0155	NA	NA	NA	NA	Response Low	NA	uM	13.4278	18
19	Unknown Sample	F 22	Method Settings	5.85724e+07	8.70587e+06	6.72792	NA	NA	NA	NA	Response Low	NA	uM	13.4278	19
20	Unknown Sample	F 23	Method Settings	7.00477e+07	9.63896e+06	7.26714	NA	NA	NA	NA	Response Low	NA	uM	13.4279	20
21	Unknown Sample	F 24	Method Settings	6.79126e+07	9.91316e+06	6.85075	NA	NA	NA	NA	Response Low	NA	uM	13.4279	21
22	Unknown Sample	F 1	Method Settings	1.38116e+08	1.42152e+07	9.71606	NA	NA	NA	NA	Response Low	NA	uM	13.4351	22
23	Unknown Sample	F 2	Method Settings	1.52877e+08	1.45011e+07	10.5425	NA	NA	NA	NA	Response Low	NA	uM	13.4351	23
24	Unknown Sample	F 3	Method Settings	1.52512e+08	1.46938e+07	10.3793	NA	NA	NA	NA	Response Low	NA	uM	13.4352	24
25	Unknown Sample	F 4	Method Settings	1.5939e+08	1.65408e+07	9.63616	NA	NA	NA	NA	Response Low	NA	uM	13.4423	25
26	Unknown Sample	F 5	Method Settings	1.81528e+08	1.80101e+07	10.0792	NA	NA	NA	NA	Response Low	NA	uM	13.4422	26
27	Unknown Sample	F 6	Method Settings	1.48346e+08	1.44606e+07	10.2586	NA	NA	NA	NA	Response Low	NA	uM	13.435	27
28	Unknown Sample	F 7	Method Settings	1.35471e+08	1.64098e+07	8.25546	NA	NA	NA	NA	Response Low	NA	uM	13.4351	28
29	Unknown Sample	F 8	Method Settings	1.17129e+08	1.52802e+07	7.66539	NA	NA	NA	NA	Response Low	NA	uM	13.4352	29
30	Unknown Sample	F 9	Method Settings	1.38271e+08	1.4624e+07	9.45507	NA	NA	NA	NA	Response Low	NA	uM	13.4349	30
31	Unknown Sample	F 10	Method Settings	1.25005e+08	1.3123e+07	9.52563	NA	NA	NA	NA	Response Low	NA	uM	13.435	31
32	Unknown Sample	F 11	Method Settings	1.26746e+08	1.30574e+07	9.7068	NA	NA	NA	NA	Response Low	NA	uM	13.4351	32
33	Unknown Sample	F 12	Method Settings	9.34757e+07	1.16575e+07	22	NA	NA	NA	NA	Response Low	NA	uM	13.4278	37
	Control-Std: 1 mL MeCN + 10 µL 1 mM C19:1 (IS) + 1 µL 10 mM C20:4
Created By:
User Name		Full Name		Date
Beckmabi		Beckmann, Bibiana		4/29/2022 10:02:38 AM

## Sheet: 9-cis-Tetradecenoic_acid
Component Name		Curve Index	Weighting Index	Origin Index	Equation
9-cis-Tetradecenoic acid, C14:1, 225					N/A
					2_Nonadecenoic_acid		Specified	Calculated
Filename	Sample Type	Sample Name	Integ. Type	Area	ISTD Area	PAR	Amount	Amount	%Diff	%RSD-AMT	Peak Status	Level	Units	RT	Sample ID
01	Unknown Sample	Toluol 1	Method Settings	NF	313.709	#VALUE!	NA	NF	NF	NF	Not Found	NA	uM	NF	1
02	Unknown Sample	Toluol 2	Method Settings	97.0672	NF	#VALUE!	NA	NA	NA	NA		NA	uM	13.6588	2
03	Unknown Sample	Toluol 3	Method Settings	NF	114.119	#VALUE!	NA	NF	NF	NF	Not Found	NA	uM	NF	3
04	Unknown Sample	Control-Std. a	Method Settings	1195.69	2.01502e+06	0.000593387	NA	NA	NA	NA	Response Low	NA	uM	13.4349	4
05	Unknown Sample	Control-Std. b	Method Settings	1602.5	2.6521e+06	0.00060424	NA	NA	NA	NA	Response Low	NA	uM	13.4352	5
06	Unknown Sample	Toluol 4	Method Settings	NF	582.298	#VALUE!	NA	NF	NF	NF	Not Found	NA	uM	NF	6
07	Unknown Sample	Toluol 5	Method Settings	NF	256.578	#VALUE!	NA	NF	NF	NF	Not Found	NA	uM	NF	7
08	Unknown Sample	Toluol 6	Method Settings	NF	39.0815	#VALUE!	NA	NF	NF	NF	Not Found	NA	uM	NF	8
09	Unknown Sample	F 13.a	Manual Integration	1.13262e+07	7.6654e+06	1.47758	NA	NA	NA	NA	Response Low	NA	uM	13.4933	9
10	Unknown Sample	F 13.b	Manual Integration	1.45324e+07	9.05293e+06	1.60527	NA	NA	NA	NA	Response Low	NA	uM	13.4928	10
11	Unknown Sample	F 14	Manual Integration	1.52186e+07	1.12458e+07	1.35327	NA	NA	NA	NA	Response Low	NA	uM	13.4929	11
12	Unknown Sample	F 15	Manual Integration	1.34498e+07	9.66642e+06	1.39139	NA	NA	NA	NA	Response Low	NA	uM	13.4926	12
13	Unknown Sample	F 16	Method Settings	1.48819e+07	1.03558e+07	1.43707	NA	NA	NA	NA	Response Low	NA	uM	13.4929	13
14	Unknown Sample	F 17	Method Settings	1.20826e+07	1.0482e+07	1.1527	NA	NA	NA	NA	Response Low	NA	uM	13.4926	14
15	Unknown Sample	F 18	Method Settings	1.26754e+07	1.13185e+07	1.11987	NA	NA	NA	NA	Response Low	NA	uM	13.4925	15
16	Unknown Sample	F 19	Method Settings	1.47966e+07	1.02837e+07	1.43884	NA	NA	NA	NA	Response Low	NA	uM	13.4924	16
17	Unknown Sample	F 20	Method Settings	1.36367e+07	1.00643e+07	1.35496	NA	NA	NA	NA	Response Low	NA	uM	13.4926	17
18	Unknown Sample	F 21	Method Settings	1.41179e+07	9.85088e+06	1.43316	NA	NA	NA	NA	Response Low	NA	uM	13.4927	18
19	Unknown Sample	F 22	Manual Integration	5.032e+06	8.70587e+06	0.578	NA	NA	NA	NA	Response Low	NA	uM	13.4926	19
20	Unknown Sample	F 23	Manual Integration	9.95732e+06	9.63896e+06	1.03303	NA	NA	NA	NA	Response Low	NA	uM	13.5	20
21	Unknown Sample	F 24	Manual Integration	7.10688e+06	9.91316e+06	0.716914	NA	NA	NA	NA	Response Low	NA	uM	13.4928	21
22	Unknown Sample	F 1	Manual Integration	4.36749e+07	1.42152e+07	3.0724	NA	NA	NA	NA	Response Low	NA	uM	13.4999	22
23	Unknown Sample	F 2	Manual Integration	5.5957e+07	1.45011e+07	3.85882	NA	NA	NA	NA	Response Low	NA	uM	13.4999	23
24	Unknown Sample	F 3	Manual Integration	5.13405e+07	1.46938e+07	3.49402	NA	NA	NA	NA	Response Low	NA	uM	13.5001	24
25	Unknown Sample	F 4	Manual Integration	5.00715e+07	1.65408e+07	3.02715	NA	NA	NA	NA	Response Low	NA	uM	13.5	25
26	Unknown Sample	F 5	Manual Integration	6.5927e+07	1.80101e+07	3.66056	NA	NA	NA	NA	Response Low	NA	uM	13.4998	26
27	Unknown Sample	F 6	Manual Integration	4.0566e+07	1.44606e+07	2.80529	NA	NA	NA	NA	Response Low	NA	uM	13.4999	27
28	Unknown Sample	F 7	Manual Integration	4.53746e+07	1.64098e+07	2.76509	NA	NA	NA	NA	Response Low	NA	uM	13.4999	28
29	Unknown Sample	F 8	Manual Integration	3.32426e+07	1.52802e+07	2.17553	NA	NA	NA	NA	Response Low	NA	uM	13.5	29
30	Unknown Sample	F 9	Manual Integration	4.1204e+07	1.4624e+07	2.81755	NA	NA	NA	NA	Response Low	NA	uM	13.4998	30
31	Unknown Sample	F 10	Manual Integration	3.7062e+07	1.3123e+07	2.82419	NA	NA	NA	NA	Response Low	NA	uM	13.4999	31
32	Unknown Sample	F 11	Manual Integration	4.34739e+07	1.30574e+07	3.32944	NA	NA	NA	NA	Response Low	NA	uM	13.4999	32
33	Unknown Sample	F 12	Manual Integration	1.87955e+07	1.16575e+07	1.6123	NA	NA	NA	NA	Response Low	NA	uM	13.4926	37
	Control-Std: 1 mL MeCN + 10 µL 1 mM C19:1 (IS) + 1 µL 10 mM C20:4
Created By:
User Name		Full Name		Date
Beckmabi		Beckmann, Bibiana		4/29/2022 10:02:38 AM

## Sheet: Hexadecanoic_acid
Component Name		Curve Index	Weighting Index	Origin Index	Equation
Hexadecanoic acid, C16:0, 255, Palmitic acid					N/A
					2_Nonadecenoic_acid		Specified	Calculated
Filename	Sample Type	Sample Name	Integ. Type	Area	ISTD Area	PAR	Amount	Amount	%Diff	%RSD-AMT	Peak Status	Level	Units	RT	Sample ID
01	Unknown Sample	Toluol 1	Method Settings	NF	313.709	#VALUE!	NA	NF	NF	NF	Not Found	NA	uM	NF	1
02	Unknown Sample	Toluol 2	Method Settings	NF	NF	#VALUE!	NA	NF	NF	NF	Not Found	NA	uM	NF	2
03	Unknown Sample	Toluol 3	Method Settings	NF	114.119	#VALUE!	NA	NF	NF	NF	Not Found	NA	uM	NF	3
04	Unknown Sample	Control-Std. a	Method Settings	54724.5	2.01502e+06	0.0271583	NA	NA	NA	NA	Response Low	NA	uM	14.0547	4
05	Unknown Sample	Control-Std. b	Method Settings	64613.9	2.6521e+06	0.0243633	NA	NA	NA	NA	Response Low	NA	uM	14.0478	5
06	Unknown Sample	Toluol 4	Method Settings	NF	582.298	#VALUE!	NA	NF	NF	NF	Not Found	NA	uM	NF	6
07	Unknown Sample	Toluol 5	Method Settings	NF	256.578	#VALUE!	NA	NF	NF	NF	Not Found	NA	uM	NF	7
08	Unknown Sample	Toluol 6	Method Settings	35.0823	39.0815	0.897669	NA	NA	NA	NA		NA	uM	14.2783	8
09	Unknown Sample	F 13.a	Method Settings	NF	7.6654e+06	#VALUE!	NA	NF	NF	NF	Not Found	NA	uM	NF	9
10	Unknown Sample	F 13.b	Method Settings	NF	9.05293e+06	#VALUE!	NA	NF	NF	NF	Not Found	NA	uM	NF	10
11	Unknown Sample	F 14	Method Settings	8.58161e+07	1.12458e+07	7.63095	NA	NA	NA	NA	Response Low	NA	uM	14.0622	11
12	Unknown Sample	F 15	Method Settings	7.71974e+07	9.66642e+06	7.98614	NA	NA	NA	NA	Response Low	NA	uM	14.0548	12
13	Unknown Sample	F 16	Method Settings	1.05986e+08	1.03558e+07	10.2345	NA	NA	NA	NA	Response Low	NA	uM	14.0623	13
14	Unknown Sample	F 17	Method Settings	1.03146e+08	1.0482e+07	9.84032	NA	NA	NA	NA	Response Low	NA	uM	14.062	14
15	Unknown Sample	F 18	Method Settings	1.09345e+08	1.13185e+07	9.66068	NA	NA	NA	NA	Response Low	NA	uM	14.0618	15
16	Unknown Sample	F 19	Method Settings	6.63813e+07	1.02837e+07	6.45497	NA	NA	NA	NA	Response Low	NA	uM	14.0546	16
17	Unknown Sample	F 20	Method Settings	7.08899e+07	1.00643e+07	7.0437	NA	NA	NA	NA	Response Low	NA	uM	14.0548	17
18	Unknown Sample	F 21	Method Settings	6.60718e+07	9.85088e+06	6.7072	NA	NA	NA	NA	Response Low	NA	uM	14.0548	18
19	Unknown Sample	F 22	Method Settings	5.46455e+07	8.70587e+06	6.27686	NA	NA	NA	NA	Response Low	NA	uM	14.0548	19
20	Unknown Sample	F 23	Method Settings	6.34255e+07	9.63896e+06	6.58012	NA	NA	NA	NA	Response Low	NA	uM	14.0622	20
21	Unknown Sample	F 24	Method Settings	6.17236e+07	9.91316e+06	6.22642	NA	NA	NA	NA	Response Low	NA	uM	14.0549	21
22	Unknown Sample	F 1	Method Settings	1.34059e+08	1.42152e+07	9.43068	NA	NA	NA	NA	Response Low	NA	uM	14.0693	22
23	Unknown Sample	F 2	Method Settings	1.44271e+08	1.45011e+07	9.94901	NA	NA	NA	NA	Response Low	NA	uM	14.0693	23
24	Unknown Sample	F 3	Method Settings	1.54513e+08	1.46938e+07	10.5155	NA	NA	NA	NA	Response Low	NA	uM	14.0694	24
25	Unknown Sample	F 4	Manual Integration	1.79088e+08	1.65408e+07	10.827	NA	NA	NA	NA	Response Low	NA	uM	14.0765	25
26	Unknown Sample	F 5	Method Settings	2.00506e+08	1.80101e+07	11.133	NA	NA	NA	NA	Response Low	NA	uM	14.0836	26
27	Unknown Sample	F 6	Method Settings	1.6872e+08	1.44606e+07	11.6676	NA	NA	NA	NA	Response Low	NA	uM	14.0765	27
28	Unknown Sample	F 7	Method Settings	1.38162e+08	1.64098e+07	8.41945	NA	NA	NA	NA	Response Low	NA	uM	14.0693	28
29	Unknown Sample	F 8	Method Settings	1.20289e+08	1.52802e+07	7.87221	NA	NA	NA	NA	Response Low	NA	uM	14.0694	29
30	Unknown Sample	F 9	Method Settings	1.32031e+08	1.4624e+07	9.02839	NA	NA	NA	NA	Response Low	NA	uM	14.0692	30
31	Unknown Sample	F 10	Method Settings	1.1942e+08	1.3123e+07	9.10005	NA	NA	NA	NA	Response Low	NA	uM	14.0692	31
32	Unknown Sample	F 11	Method Settings	1.30429e+08	1.30574e+07	9.98888	NA	NA	NA	NA	Response Low	NA	uM	14.0693	32
33	Unknown Sample	F 12	Method Settings	9.98315e+07	1.16575e+07	8.56368	NA	NA	NA	NA	Response Low	NA	uM	14.062	37
		Control-Std: 1 mL MeCN + 10 µL 1 mM C19:1 (IS) + 1 µL 10 mM C20:4
Created By:
User Name		Full Name		Date
Beckmabi		Beckmann, Bibiana		4/29/2022 10:02:38 AM

## Sheet: 9-cis-Hexadecenoic_acid
Component Name		Curve Index	Weighting Index	Origin Index	Equation
9-cis-Hexadecenoic acid, C16:1, 253, Palmitoleic acid					N/A
					2_Nonadecenoic_acid		Specified	Calculated
Filename	Sample Type	Sample Name	Integ. Type	Area	ISTD Area	PAR	Amount	Amount	%Diff	%RSD-AMT	Peak Status	Level	Units	RT	Sample ID
01	Unknown Sample	Toluol 1	Method Settings	NF	313.709	#VALUE!	NA	NF	NF	NF	Not Found	NA	uM	NF	1
02	Unknown Sample	Toluol 2	Method Settings	129.705	NF	#VALUE!	NA	NA	NA	NA		NA	uM	14.0696	2
03	Unknown Sample	Toluol 3	Method Settings	NF	114.119	#VALUE!	NA	NF	NF	NF	Not Found	NA	uM	NF	3
04	Unknown Sample	Control-Std. a	Method Settings	5281.78	2.01502e+06	0.0026212	NA	NA	NA	NA	Response Low	NA	uM	14.0547	4
05	Unknown Sample	Control-Std. b	Method Settings	7052.2	2.6521e+06	0.0026591	NA	NA	NA	NA	Response Low	NA	uM	14.0478	5
06	Unknown Sample	Toluol 4	Method Settings	NF	582.298	#VALUE!	NA	NF	NF	NF	Not Found	NA	uM	NF	6
07	Unknown Sample	Toluol 5	Method Settings	NF	256.578	#VALUE!	NA	NF	NF	NF	Not Found	NA	uM	NF	7
08	Unknown Sample	Toluol 6	Method Settings	NF	39.0815	#VALUE!	NA	NF	NF	NF	Not Found	NA	uM	NF	8
09	Unknown Sample	F 13.a	Method Settings	NF	7.6654e+06	#VALUE!	NA	NF	NF	NF	Not Found	NA	uM	NF	9
10	Unknown Sample	F 13.b	Method Settings	NF	9.05293e+06	#VALUE!	NA	NF	NF	NF	Not Found	NA	uM	NF	10
11	Unknown Sample	F 14	Method Settings	1.11154e+08	1.12458e+07	9.88403	NA	NA	NA	NA	Response Low	NA	uM	14.0911	11
12	Unknown Sample	F 15	Method Settings	1.02084e+08	9.66642e+06	10.5607	NA	NA	NA	NA	Response Low	NA	uM	14.0908	12
13	Unknown Sample	F 16	Method Settings	1.2359e+08	1.03558e+07	11.9344	NA	NA	NA	NA	Response Low	NA	uM	14.0983	13
14	Unknown Sample	F 17	Method Settings	1.22765e+08	1.0482e+07	11.712	NA	NA	NA	NA	Response Low	NA	uM	14.098	14
15	Unknown Sample	F 18	Method Settings	1.22768e+08	1.13185e+07	10.8467	NA	NA	NA	NA	Response Low	NA	uM	14.0907	15
16	Unknown Sample	F 19	Method Settings	8.41108e+07	1.02837e+07	8.17901	NA	NA	NA	NA	Response Low	NA	uM	14.0906	16
17	Unknown Sample	F 20	Method Settings	9.91899e+07	1.00643e+07	9.85561	NA	NA	NA	NA	Response Low	NA	uM	14.0908	17
18	Unknown Sample	F 21	Method Settings	8.92977e+07	9.85088e+06	9.06494	NA	NA	NA	NA	Response Low	NA	uM	14.0909	18
19	Unknown Sample	F 22	Method Settings	7.65704e+07	8.70587e+06	8.79526	NA	NA	NA	NA	Response Low	NA	uM	14.0908	19
20	Unknown Sample	F 23	Method Settings	8.87642e+07	9.63896e+06	9.20891	NA	NA	NA	NA	Response Low	NA	uM	14.0982	20
21	Unknown Sample	F 24	Method Settings	8.6797e+07	9.91316e+06	8.75573	NA	NA	NA	NA	Response Low	NA	uM	14.091	21
22	Unknown Sample	F 1	Method Settings	1.86499e+08	1.42152e+07	13.1197	NA	NA	NA	NA	Response Low	NA	uM	14.1053	22
23	Unknown Sample	F 2	Method Settings	1.99425e+08	1.45011e+07	13.7524	NA	NA	NA	NA	Response Low	NA	uM	14.1053	23
24	Unknown Sample	F 3	Method Settings	1.9291e+08	1.46938e+07	13.1287	NA	NA	NA	NA	Response Low	NA	uM	14.1055	24
25	Unknown Sample	F 4	Method Settings	2.33892e+08	1.65408e+07	14.1403	NA	NA	NA	NA	Response Low	NA	uM	14.1126	25
26	Unknown Sample	F 5	Method Settings	2.38596e+08	1.80101e+07	13.2479	NA	NA	NA	NA	Response Low	NA	uM	14.1124	26
27	Unknown Sample	F 6	Method Settings	2.10201e+08	1.44606e+07	14.5361	NA	NA	NA	NA	Response Low	NA	uM	14.1053	27
28	Unknown Sample	F 7	Method Settings	1.85201e+08	1.64098e+07	11.286	NA	NA	NA	NA	Response Low	NA	uM	14.1053	28
29	Unknown Sample	F 8	Method Settings	1.66013e+08	1.52802e+07	10.8646	NA	NA	NA	NA	Response Low	NA	uM	14.1054	29
30	Unknown Sample	F 9	Method Settings	1.75611e+08	1.4624e+07	12.0084	NA	NA	NA	NA	Response Low	NA	uM	14.1052	30
31	Unknown Sample	F 10	Method Settings	1.61313e+08	1.3123e+07	12.2923	NA	NA	NA	NA	Response Low	NA	uM	14.0981	31
32	Unknown Sample	F 11	Method Settings	1.72632e+08	1.30574e+07	13.221	NA	NA	NA	NA	Response Low	NA	uM	14.1053	32
33	Unknown Sample	F 12	Method Settings	1.33822e+08	1.16575e+07	11.4795	NA	NA	NA	NA	Response Low	NA	uM	14.098	37
		Control-Std: 1 mL MeCN + 10 µL 1 mM C19:1 (IS) + 1 µL 10 mM C20:4
Created By:
User Name		Full Name		Date
Beckmabi		Beckmann, Bibiana		4/29/2022 10:02:38 AM

## Sheet: Heptadecanoic_acid
Component Name		Curve Index	Weighting Index	Origin Index	Equation
Heptadecanoic acid, C17:0, 269					N/A
					2_Nonadecenoic_acid		Specified	Calculated
Filename	Sample Type	Sample Name	Integ. Type	Area	ISTD Area	PAR	Amount	Amount	%Diff	%RSD-AMT	Peak Status	Level	Units	RT	Sample ID
01	Unknown Sample	Toluol 1	Method Settings	NF	313.709	#VALUE!	NA	NF	NF	NF	Not Found	NA	uM	NF	1
02	Unknown Sample	Toluol 2	Method Settings	31.8926	NF	#VALUE!	NA	NA	NA	NA		NA	uM	14.2786	2
03	Unknown Sample	Toluol 3	Method Settings	NF	114.119	#VALUE!	NA	NF	NF	NF	Not Found	NA	uM	NF	3
04	Unknown Sample	Control-Std. a	Method Settings	1197.06	2.01502e+06	0.000594067	NA	NA	NA	NA	Response Low	NA	uM	14.3214	4
05	Unknown Sample	Control-Std. b	Manual Integration	1343.82	2.6521e+06	0.000506701	NA	NA	NA	NA	Response Low	NA	uM	14.3217	5
06	Unknown Sample	Toluol 4	Method Settings	NF	582.298	#VALUE!	NA	NF	NF	NF	Not Found	NA	uM	NF	6
07	Unknown Sample	Toluol 5	Method Settings	NF	256.578	#VALUE!	NA	NF	NF	NF	Not Found	NA	uM	NF	7
08	Unknown Sample	Toluol 6	Method Settings	NF	39.0815	#VALUE!	NA	NF	NF	NF	Not Found	NA	uM	NF	8
09	Unknown Sample	F 13.a	Method Settings	NF	7.6654e+06	#VALUE!	NA	NF	NF	NF	Not Found	NA	uM	NF	9
10	Unknown Sample	F 13.b	Method Settings	NF	9.05293e+06	#VALUE!	NA	NF	NF	NF	Not Found	NA	uM	NF	10
11	Unknown Sample	F 14	Method Settings	340909	1.12458e+07	0.0303143	NA	NA	NA	NA	Response Low	NA	uM	14.3217	11
12	Unknown Sample	F 15	Method Settings	249860	9.66642e+06	0.0258482	NA	NA	NA	NA	Response Low	NA	uM	14.3215	12
13	Unknown Sample	F 16	Method Settings	328320	1.03558e+07	0.0317041	NA	NA	NA	NA	Response Low	NA	uM	14.3217	13
14	Unknown Sample	F 17	Method Settings	340223	1.0482e+07	0.0324578	NA	NA	NA	NA	Response Low	NA	uM	14.3214	14
15	Unknown Sample	F 18	Method Settings	316456	1.13185e+07	0.0279591	NA	NA	NA	NA	Response Low	NA	uM	14.3213	15
16	Unknown Sample	F 19	Method Settings	216389	1.02837e+07	0.0210418	NA	NA	NA	NA	Response Low	NA	uM	14.3212	16
17	Unknown Sample	F 20	Method Settings	334911	1.00643e+07	0.0332771	NA	NA	NA	NA	Response Low	NA	uM	14.3214	17
18	Unknown Sample	F 21	Method Settings	244966	9.85088e+06	0.0248674	NA	NA	NA	NA	Response Low	NA	uM	14.3215	18
19	Unknown Sample	F 22	Method Settings	149140	8.70587e+06	0.0171309	NA	NA	NA	NA	Response Low	NA	uM	14.3215	19
20	Unknown Sample	F 23	Method Settings	147378	9.63896e+06	0.0152899	NA	NA	NA	NA	Response Low	NA	uM	14.3288	20
21	Unknown Sample	F 24	Method Settings	152514	9.91316e+06	0.015385	NA	NA	NA	NA	Response Low	NA	uM	14.3216	21
22	Unknown Sample	F 1	Method Settings	672886	1.42152e+07	0.0473356	NA	NA	NA	NA	Response Low	NA	uM	14.3215	22
23	Unknown Sample	F 2	Method Settings	755279	1.45011e+07	0.0520844	NA	NA	NA	NA	Response Low	NA	uM	14.3216	23
24	Unknown Sample	F 3	Method Settings	708551	1.46938e+07	0.048221	NA	NA	NA	NA	Response Low	NA	uM	14.3217	24
25	Unknown Sample	F 4	Manual Integration	1.13111e+06	1.65408e+07	0.0683832	NA	NA	NA	NA	Response Low	NA	uM	14.3288	25
26	Unknown Sample	F 5	Manual Integration	1.87012e+06	1.80101e+07	0.103837	NA	NA	NA	NA	Response Low	NA	uM	14.3287	26
27	Unknown Sample	F 6	Method Settings	860407	1.44606e+07	0.0595002	NA	NA	NA	NA	Response Low	NA	uM	14.3287	27
28	Unknown Sample	F 7	Method Settings	1.16628e+06	1.64098e+07	0.0710722	NA	NA	NA	NA	Response Low	NA	uM	14.3287	28
29	Unknown Sample	F 8	Method Settings	889076	1.52802e+07	0.0581848	NA	NA	NA	NA	Response Low	NA	uM	14.3289	29
30	Unknown Sample	F 9	Method Settings	1.20816e+06	1.4624e+07	0.0826149	NA	NA	NA	NA	Response Low	NA	uM	14.3214	30
31	Unknown Sample	F 10	Method Settings	488264	1.3123e+07	0.0372066	NA	NA	NA	NA	Response Low	NA	uM	14.3215	31
32	Unknown Sample	F 11	Method Settings	670448	1.30574e+07	0.0513462	NA	NA	NA	NA	Response Low	NA	uM	14.3215	32
33	Unknown Sample	F 12	Method Settings	571365	1.16575e+07	0.0490125	NA	NA	NA	NA	Response Low	NA	uM	14.3215	37
			Control-Std: 1 mL MeCN + 10 µL 1 mM C19:1 (IS) + 1 µL 10 mM C20:4
Created By:
User Name		Full Name		Date
Beckmabi		Beckmann, Bibiana		4/29/2022 10:02:38 AM

## Sheet: 10_-cis-Heptadecenoic_acid
Component Name		Curve Index	Weighting Index	Origin Index	Equation
10?-cis-Heptadecenoic acid, C17:1, 267					N/A
					2_Nonadecenoic_acid		Specified	Calculated
Filename	Sample Type	Sample Name	Integ. Type	Area	ISTD Area	PAR	Amount	Amount	%Diff	%RSD-AMT	Peak Status	Level	Units	RT	Sample ID
01	Unknown Sample	Toluol 1	Method Settings	NF	313.709	#VALUE!	NA	NF	NF	NF	Not Found	NA	uM	NF	1
02	Unknown Sample	Toluol 2	Method Settings	106.924	NF	#VALUE!	NA	NA	NA	NA		NA	uM	14.4083	2
03	Unknown Sample	Toluol 3	Method Settings	NF	114.119	#VALUE!	NA	NF	NF	NF	Not Found	NA	uM	NF	3
04	Unknown Sample	Control-Std. a	Manual Integration	425.992	2.01502e+06	0.000211408	NA	NA	NA	NA	Response Low	NA	uM	14.3286	4
05	Unknown Sample	Control-Std. b	Manual Integration	531	2.6521e+06	0.000200219	NA	NA	NA	NA	Response Low	NA	uM	14.3289	5
06	Unknown Sample	Toluol 4	Method Settings	NF	582.298	#VALUE!	NA	NF	NF	NF	Not Found	NA	uM	NF	6
07	Unknown Sample	Toluol 5	Method Settings	NF	256.578	#VALUE!	NA	NF	NF	NF	Not Found	NA	uM	NF	7
08	Unknown Sample	Toluol 6	Method Settings	34.6021	39.0815	0.885383	NA	NA	NA	NA		NA	uM	14.4152	8
09	Unknown Sample	F 13.a	Method Settings	NF	7.6654e+06	#VALUE!	NA	NF	NF	NF	Not Found	NA	uM	NF	9
10	Unknown Sample	F 13.b	Method Settings	NF	9.05293e+06	#VALUE!	NA	NF	NF	NF	Not Found	NA	uM	NF	10
11	Unknown Sample	F 14	Method Settings	578980	1.12458e+07	0.0514841	NA	NA	NA	NA	Response Low	NA	uM	14.3505	11
12	Unknown Sample	F 15	Method Settings	386874	9.66642e+06	0.0400225	NA	NA	NA	NA	Response Low	NA	uM	14.3431	12
13	Unknown Sample	F 16	Method Settings	695146	1.03558e+07	0.0671266	NA	NA	NA	NA	Response Low	NA	uM	14.3505	13
14	Unknown Sample	F 17	Method Settings	745740	1.0482e+07	0.0711448	NA	NA	NA	NA	Response Low	NA	uM	14.3503	14
15	Unknown Sample	F 18	Method Settings	625502	1.13185e+07	0.0552634	NA	NA	NA	NA	Response Low	NA	uM	14.3501	15
16	Unknown Sample	F 19	Method Settings	473479	1.02837e+07	0.0460415	NA	NA	NA	NA	Response Low	NA	uM	14.3501	16
17	Unknown Sample	F 20	Method Settings	1.22279e+06	1.00643e+07	0.121497	NA	NA	NA	NA	Response Low	NA	uM	14.3502	17
18	Unknown Sample	F 21	Method Settings	603561	9.85088e+06	0.0612697	NA	NA	NA	NA	Response Low	NA	uM	14.3503	18
19	Unknown Sample	F 22	Method Settings	366284	8.70587e+06	0.0420732	NA	NA	NA	NA	Response Low	NA	uM	14.3503	19
20	Unknown Sample	F 23	Method Settings	409374	9.63896e+06	0.0424708	NA	NA	NA	NA	Response Low	NA	uM	14.3504	20
21	Unknown Sample	F 24	Method Settings	422800	9.91316e+06	0.0426503	NA	NA	NA	NA	Response Low	NA	uM	14.3504	21
22	Unknown Sample	F 1	Method Settings	4.07184e+06	1.42152e+07	0.286442	NA	NA	NA	NA	Response Low	NA	uM	14.3504	22
23	Unknown Sample	F 2	Method Settings	4.83589e+06	1.45011e+07	0.333486	NA	NA	NA	NA	Response Low	NA	uM	14.3504	23
24	Unknown Sample	F 3	Method Settings	4.66013e+06	1.46938e+07	0.317149	NA	NA	NA	NA	Response Low	NA	uM	14.3505	24
25	Unknown Sample	F 4	Manual Integration	7.64409e+06	1.65408e+07	0.462135	NA	NA	NA	NA	Response Low	NA	uM	14.3504	25
26	Unknown Sample	F 5	Manual Integration	1.18471e+07	1.80101e+07	0.657804	NA	NA	NA	NA	Response Low	NA	uM	14.3503	26
27	Unknown Sample	F 6	Method Settings	5.71161e+06	1.44606e+07	0.394978	NA	NA	NA	NA	Response Low	NA	uM	14.3503	27
28	Unknown Sample	F 7	Method Settings	9.07149e+06	1.64098e+07	0.552809	NA	NA	NA	NA	Response Low	NA	uM	14.3504	28
29	Unknown Sample	F 8	Method Settings	6.66845e+06	1.52802e+07	0.436411	NA	NA	NA	NA	Response Low	NA	uM	14.3505	29
30	Unknown Sample	F 9	Method Settings	9.32353e+06	1.4624e+07	0.637549	NA	NA	NA	NA	Response Low	NA	uM	14.3502	30
31	Unknown Sample	F 10	Method Settings	3.03289e+06	1.3123e+07	0.231112	NA	NA	NA	NA	Response Low	NA	uM	14.3503	31
32	Unknown Sample	F 11	Method Settings	4.54557e+06	1.30574e+07	0.348122	NA	NA	NA	NA	Response Low	NA	uM	14.3504	32
33	Unknown Sample	F 12	Method Settings	2.75986e+06	1.16575e+07	0.236745	NA	NA	NA	NA	Response Low	NA	uM	14.3503	37
				Control-Std: 1 mL MeCN + 10 µL 1 mM C19:1 (IS) + 1 µL 10 mM C20:4
Created By:
User Name		Full Name		Date
Beckmabi		Beckmann, Bibiana		4/29/2022 10:02:38 AM

## Sheet: 9-trans-Octadecenoic_acid
Component Name		Curve Index	Weighting Index	Origin Index	Equation
					N/A
					2_Nonadecenoic_acid		Specified	Calculated
Filename	Sample Type	Sample Name	Integ. Type	Area	ISTD Area	Area Ratio	Amount	Amount	%Diff	%RSD-AMT	Peak Status	Level	Units	RT	Sample ID
01	Unknown Sample	Toluol 1	Method Settings	NF	313.709	#VALUE!	NA	NF	NF	NF	Not Found	NA	uM	NF	1
02	Unknown Sample	Toluol 2	Method Settings	NF	NF	#VALUE!	NA	NF	NF	NF	Not Found	NA	uM	NF	2
03	Unknown Sample	Toluol 3	Method Settings	NF	114.119	#VALUE!	NA	NF	NF	NF	Not Found	NA	uM	NF	3
04	Unknown Sample	Control-Std. a	Method Settings	NF	2.01502e+06	#VALUE!	NA	NF	NF	NF	Not Found	NA	uM	NF	4
05	Unknown Sample	Control-Std. b	Method Settings	NF	2.6521e+06	#VALUE!	NA	NF	NF	NF	Not Found	NA	uM	NF	5
06	Unknown Sample	Toluol 4	Method Settings	NF	582.298	#VALUE!	NA	NF	NF	NF	Not Found	NA	uM	NF	6
07	Unknown Sample	Toluol 5	Method Settings	NF	256.578	#VALUE!	NA	NF	NF	NF	Not Found	NA	uM	NF	7
08	Unknown Sample	Toluol 6	Method Settings	NF	39.0815	#VALUE!	NA	NF	NF	NF	Not Found	NA	uM	NF	8
09	Unknown Sample	F 13.a	Method Settings	NF	7.6654e+06	#VALUE!	NA	NF	NF	NF	Not Found	NA	uM	NF	9
10	Unknown Sample	F 13.b	Method Settings	NF	9.05293e+06	#VALUE!	NA	NF	NF	NF	Not Found	NA	uM	NF	10
11	Unknown Sample	F 14	Method Settings	NF	1.12458e+07	#VALUE!	NA	NF	NF	NF	Not Found	NA	uM	NF	11
12	Unknown Sample	F 15	Method Settings	NF	9.66642e+06	#VALUE!	NA	NF	NF	NF	Not Found	NA	uM	NF	12
13	Unknown Sample	F 16	Method Settings	NF	1.03558e+07	#VALUE!	NA	NF	NF	NF	Not Found	NA	uM	NF	13
14	Unknown Sample	F 17	Method Settings	NF	1.0482e+07	#VALUE!	NA	NF	NF	NF	Not Found	NA	uM	NF	14
15	Unknown Sample	F 18	Method Settings	NF	1.13185e+07	#VALUE!	NA	NF	NF	NF	Not Found	NA	uM	NF	15
16	Unknown Sample	F 19	Method Settings	NF	1.02837e+07	#VALUE!	NA	NF	NF	NF	Not Found	NA	uM	NF	16
17	Unknown Sample	F 20	Method Settings	NF	1.00643e+07	#VALUE!	NA	NF	NF	NF	Not Found	NA	uM	NF	17
18	Unknown Sample	F 21	Method Settings	NF	9.85088e+06	#VALUE!	NA	NF	NF	NF	Not Found	NA	uM	NF	18
19	Unknown Sample	F 22	Method Settings	NF	8.70587e+06	#VALUE!	NA	NF	NF	NF	Not Found	NA	uM	NF	19
20	Unknown Sample	F 23	Method Settings	NF	9.63896e+06	#VALUE!	NA	NF	NF	NF	Not Found	NA	uM	NF	20
21	Unknown Sample	F 24	Method Settings	NF	9.91316e+06	#VALUE!	NA	NF	NF	NF	Not Found	NA	uM	NF	21
22	Unknown Sample	F 1	Method Settings	NF	1.42152e+07	#VALUE!	NA	NF	NF	NF	Not Found	NA	uM	NF	22
23	Unknown Sample	F 2	Method Settings	NF	1.45011e+07	#VALUE!	NA	NF	NF	NF	Not Found	NA	uM	NF	23
24	Unknown Sample	F 3	Method Settings	NF	1.46938e+07	#VALUE!	NA	NF	NF	NF	Not Found	NA	uM	NF	24
25	Unknown Sample	F 4	Method Settings	NF	1.65408e+07	#VALUE!	NA	NF	NF	NF	Not Found	NA	uM	NF	25
26	Unknown Sample	F 5	Method Settings	NF	1.80101e+07	#VALUE!	NA	NF	NF	NF	Not Found	NA	uM	NF	26
27	Unknown Sample	F 6	Method Settings	NF	1.44606e+07	#VALUE!	NA	NF	NF	NF	Not Found	NA	uM	NF	27
28	Unknown Sample	F 7	Method Settings	NF	1.64098e+07	#VALUE!	NA	NF	NF	NF	Not Found	NA	uM	NF	28
29	Unknown Sample	F 8	Method Settings	NF	1.52802e+07	#VALUE!	NA	NF	NF	NF	Not Found	NA	uM	NF	29
30	Unknown Sample	F 9	Method Settings	NF	1.4624e+07	#VALUE!	NA	NF	NF	NF	Not Found	NA	uM	NF	30
31	Unknown Sample	F 10	Method Settings	NF	1.3123e+07	#VALUE!	NA	NF	NF	NF	Not Found	NA	uM	NF	31
32	Unknown Sample	F 11	Method Settings	NF	1.30574e+07	#VALUE!	NA	NF	NF	NF	Not Found	NA	uM	NF	32
33	Unknown Sample	F 12	Method Settings	NF	1.16575e+07	#VALUE!	NA	NF	NF	NF	Not Found	NA	uM	NF	37
		Control-Std: 1 mL MeCN + 10 µL 1 mM C19:1 (IS) + 1 µL 10 mM C20:4
Created By:
User Name		Full Name		Date
Beckmabi		Beckmann, Bibiana		4/29/2022 10:02:38 AM

[truncated: 23 more sheets: Octadecanoic_acid, 6-cis-Octadecenoic_acid, 9-cis-Octadecenoic_acid, 11-trans-Octadecenoic_acid, 9,12-cis-Octadecenoic_acid, 9,12-cis-Octadecenoic_acid-ą_1, 9-cis-Octadecenoic_acid-13Cą_2, 6,9,12-cis-Octadecatrienoicत_3, 9,12,15-cis-Octadecatrienoiत_4, Nonadecanoic_acid, 2_Nonadecenoic_acid, Eicosanoic_acid, 11-cis-Eicosenoic_acid, 9-cis-Eicosenoic_acid, Eicosatetraenoic_acid, Eicosapentaneoic_acid_(EPA), Heneisosanoic_acid, Docosanoic_acid, Tetracosanoic_acid, 11-cis-Docosaenoic_acid …]
